# Supplementary material for: Shared Molecular and Functional Frameworks among Five Complex Human Disorders: A Comparative Study on Interactomes Linked to Susceptibility Genes
Source: PLoS One. 2011 Apr 21;6(4):e18660. doi: 10.1371/journal.pone.0018660 (PMC3080867; doi:10.1371/journal.pone.0018660)
Supplement: Table S5 — Statistical significances for interactor sharing and interactor scores. (XLS) [file pone.0018660.s005.xls]

## Sheet: Interactor score & p values
	Genes	Interactions	Visant Interaction ratio (a)
Visant interaction ratio	12888	93684	7.26909
Disease	Genes (gwas)	Interactors	Interactions	Disease interaction ratio (b)	Normalization factor (b/a)
Park	35	160	182	5.2	0.715358
Alz	17	109	118	6.94118	0.95489
T1D	52	316	387	7.44231	1.02383
RA	21	249	288	13.7143	1.88666
MS	54	376	447	8.27778	1.13876
Disease pair	Paired normalization factor
Park - Alz	0.683088
T1D- Park	0.732405
RA - Park	1.34964
T1D- Alz	0.977644
RA - Alz	1.80155
T1D- RA	1.93162
MS- Park	0.814624
MS- Alz	1.08739
MS- T1D	1.1659
MS- RA	2.14846
Disease pair	Observed	Expected	p-value*	Observed/Expected	Paired normalization factor	Interactor score
Park - Alz	10	1.3532	8.7158e-07	7.38991	0.683088	10.8184
T1D- Park	13	3.92303	0.00011753	3.31377	0.732405	4.5245
RA - Park	15	3.09125	3.9485e-07	4.85241	1.34964	3.59535
T1D- Alz	26	2.67256	6.48e-19	9.72849	0.977644	9.95095
RA - Alz	19	2.10591	2.1342e-13	9.02222	1.80155	5.00803
T1D- RA	60	6.10521	4.4225e-43	9.82767	1.93162	5.08779
MS- Park	20	4.66791	3.3582e-08	4.28457	0.814624	5.25957
MS- Alz	25	3.18001	5.209e-16	7.8616	1.08739	7.22976
MS- T1D	61	9.21912	3.0945e-33	6.61668	1.1659	5.67517
MS- RA	84	7.26443	1.0189e-67	11.5632	2.14846	5.38208
* Hypergeometric test
